# Supplementary material
Source: PubMed Central journal article supplement (PMC3405617)
Supplement: supp_50.7.2419_JCM-JCM06384-11-s01.pdf [file supp_50.7.2419_JCM-JCM06384-11-s01.pdf]

**Supplementary Table S1. *In silico* analysis of pneumococcal serotypes that can be amplified and differentiated by sequencing based on sequence diversity of *cpsB*.**

| <b>Serotype<br/>(n = 92)<sup>b</sup></b> | <b>Amplification<br/>possible<sup>a,c</sup></b> | <b>Differentiable<br/>by <i>in silico</i><br/>analysis<sup>a, c, d</sup></b> | <b>Differentiable by<br/><i>cpsB</i> PCR and<br/>sequencing?<sup>a, c, d</sup></b> | <b>Included<br/>in <i>in vitro</i><br/>testing<sup>a</sup></b> |
|------------------------------------------|-------------------------------------------------|------------------------------------------------------------------------------|------------------------------------------------------------------------------------|----------------------------------------------------------------|
| <b>1</b>                                 | Y                                               | Y                                                                            | Y                                                                                  | Y                                                              |
| <b>2</b>                                 | Y                                               | (2/41A)                                                                      | (2/41A)                                                                            | N                                                              |
| <b>3</b>                                 | Y                                               | Y                                                                            | Y                                                                                  | Y                                                              |
| <b>4</b>                                 | Y                                               | Y                                                                            | Y                                                                                  | Y                                                              |
| <b>5</b>                                 | Y                                               | Y                                                                            | Y                                                                                  | Y                                                              |
| <b>6A</b>                                | Y                                               | Y                                                                            | Y                                                                                  | Y                                                              |
| <b>6B</b>                                | Y                                               | Y                                                                            | Y                                                                                  | Y                                                              |
| 6C                                       | Y                                               | Y                                                                            | (6C/6D)                                                                            | Y                                                              |
| 6D                                       | Y                                               | Y                                                                            | (6C/6D)                                                                            | N                                                              |
| <b>7F</b>                                | Y                                               | Y                                                                            | (7A/7F)                                                                            | Y                                                              |
| 7A                                       | Y                                               | Y                                                                            | (7A/7F)                                                                            | N                                                              |
| 7B                                       | Y                                               | (7B/40)                                                                      | (7B/40)                                                                            | N                                                              |
| 7C                                       | Y                                               | Y                                                                            | Y                                                                                  | Y                                                              |
| <b>8</b>                                 | Y                                               | Y                                                                            | Y                                                                                  | Y                                                              |
| 9A                                       | Y                                               | (9A/9V)                                                                      | (9A/9V)                                                                            | N                                                              |
| 9L                                       | Y                                               | Y                                                                            | Y                                                                                  | N                                                              |
| <b>9N</b>                                | Y                                               | Y                                                                            | Y                                                                                  | Y                                                              |
| <b>9V</b>                                | Y                                               | (9V/9A)                                                                      | (9V/9A)                                                                            | Y                                                              |
| 10F                                      | Y                                               | (10F/10C)                                                                    | (10F/10C)                                                                          | Y                                                              |
| <b>10A</b>                               | Y                                               | Y                                                                            | Y                                                                                  | Y                                                              |
| 10B                                      | Y                                               | Y                                                                            | Y                                                                                  | N                                                              |
| 10C                                      | Y                                               | (10C/10F)                                                                    | (10C/10F)                                                                          | N                                                              |
| 11F                                      | N                                               | Unknown                                                                      | Unknown                                                                            | N                                                              |
| <b>11A</b>                               | Y                                               | (11A/11D/18F)                                                                | (11A/11D/18F)                                                                      | Y                                                              |
| 11B                                      | Y                                               | (11B/11C)                                                                    | (11B/11C)                                                                          | N                                                              |
| 11C                                      | Y                                               | (11B/11C)                                                                    | (11B/11C)                                                                          | N                                                              |
| 11D                                      | Y                                               | (11A/11D/18F)                                                                | (11A/11D/18F)                                                                      | N                                                              |
| <b>12F</b>                               | Y                                               | (12F/44)                                                                     | (12F/44)                                                                           | Y                                                              |
| 12A                                      | Y                                               | Y                                                                            | Y                                                                                  | N                                                              |
| 12B                                      | Y                                               | Y                                                                            | Y                                                                                  | Y                                                              |
| 13                                       | Y                                               | (13/20)                                                                      | (13/20)                                                                            | N                                                              |
| <b>14</b>                                | Y                                               | Y                                                                            | Y                                                                                  | Y                                                              |
| 15F                                      | Y                                               | Y                                                                            | Y                                                                                  | N                                                              |
| 15A                                      | Y                                               | Y                                                                            | Y                                                                                  | Y                                                              |
| <b>15B</b>                               | Y                                               | Y                                                                            | Y                                                                                  | Y                                                              |
| 15C                                      | Y                                               | Y                                                                            | Y                                                                                  | N                                                              |
| 16F                                      | Y                                               | Y                                                                            | Y                                                                                  | Y                                                              |
| 16A                                      | Y                                               | Y                                                                            | Y                                                                                  | N                                                              |
| <b>17F</b>                               | Y                                               | Y                                                                            | (17F/33C)                                                                          | Y                                                              |
| 17A                                      | Y                                               | (17A/34)                                                                     | (17A/34)                                                                           | Y                                                              |
| 18F                                      | Y                                               | (11A/11D/18F)                                                                | (11A/11D/18F)                                                                      | N                                                              |
| 18A                                      | Y                                               | Y                                                                            | Y                                                                                  | N                                                              |
| 18B                                      | Y                                               | Y                                                                            | (18B/18C)                                                                          | Y                                                              |
| 18C                                      | Y                                               | Y                                                                            | (18B/18C)                                                                          | Y                                                              |

|              |                                     |                                      |                                        |                                   |
|--------------|-------------------------------------|--------------------------------------|----------------------------------------|-----------------------------------|
| 19F          | Y                                   | Y                                    | Y                                      | Y                                 |
| 19A          | Y                                   | Y                                    | Y                                      | Y                                 |
| 19B          | Y                                   | Y                                    | Y                                      | N                                 |
| 19C          | Y                                   | Y                                    | Y                                      | N                                 |
| 20           | Y                                   | (20/13)                              | (20/13)                                | Y                                 |
| 21           | Y                                   | Y                                    | Y                                      | Y                                 |
| 22F          | Y                                   | (22F/22A)                            | (22F/22A)                              | Y                                 |
| 22A          | Y                                   | (22A/22F)                            | (22A/22F)                              | Y                                 |
| 23F          | Y                                   | Y                                    | Y                                      | Y                                 |
| 23A          | Y                                   | Y                                    | Y                                      | N                                 |
| 23B          | Y                                   | Y                                    | Y                                      | Y                                 |
| 24F          | Y                                   | Y                                    | Y                                      | Y                                 |
| 24A          | Y                                   | Y                                    | Y                                      | N                                 |
| 24B          | Y                                   | Y                                    | Y                                      | Y                                 |
| 25F          | N                                   | Unknown                              | Unknown                                | N                                 |
| 25A          | N                                   | Unknown                              | Unknown                                | N                                 |
| 27           | N                                   | Unknown                              | Unknown                                | Y                                 |
| 28F          | Y                                   | Y                                    | Y                                      | Y                                 |
| 28A          | Y                                   | Y                                    | Y                                      | Y                                 |
| 29           | N                                   | Unknown                              | Unknown                                | Y                                 |
| 31           | Y                                   | Y                                    | Y                                      | Y                                 |
| 32F          | Y                                   | (32F/32A)                            | (32F/32A)                              | N                                 |
| 32A          | Y                                   | (32A/32F)                            | (32A/32F)                              | N                                 |
| 33F          | Y                                   | (33F/33A/35A)                        | (33F/33A/35A)                          | Y                                 |
| 33A          | Y                                   | (33A/33F/35A)                        | (33A/33F/35A)                          | N                                 |
| 33B          | Y                                   | Y                                    | Y                                      | Y                                 |
| 33C          | Y                                   | Y                                    | (17F/33C)                              | Y                                 |
| 33D          | Y                                   | Y                                    | Y                                      | Y                                 |
| 34           | Y                                   | (34/17A)                             | (34/17A)                               | Y                                 |
| 35F          | Y                                   | (35F/47F)                            | (35F/47F)                              | N                                 |
| 35A          | Y                                   | (35A/33F/33A)                        | (35A/33F/33A)                          | Y                                 |
| 35B          | Y                                   | (35B/35C)                            | (35B/35C)                              | Y                                 |
| 35C          | Y                                   | (35C/35B)                            | (35C/35B)                              | N                                 |
| 36           | Y                                   | Y                                    | Y                                      | Y                                 |
| 37           | Y                                   | Y                                    | Y                                      | N                                 |
| 38           | N                                   | Unknown                              | Unknown                                | N                                 |
| 39           | N                                   | Unknown                              | Unknown                                | N                                 |
| 40           | Y                                   | (7B/40)                              | (7B/40)                                | N                                 |
| 41F          | Y                                   | Y                                    | Y                                      | N                                 |
| 41A          | Y                                   | (2/41A)                              | (2/41A)                                | N                                 |
| 42           | Y                                   | Y                                    | Y                                      | N                                 |
| 43           | N                                   | Unknown                              | Unknown                                | N                                 |
| 44           | Y                                   | (12F/44)                             | (12F/44)                               | N                                 |
| 45           | Y                                   | Y                                    | Y                                      | N                                 |
| 46           | Y                                   | Y                                    | Y                                      | N                                 |
| 47F          | Y                                   | (35F/47)                             | (35F/47)                               | N                                 |
| 47A          | Y                                   | Y                                    | Y                                      | N                                 |
| 48           | Y                                   | Y                                    | Y                                      | N                                 |
| <b>Total</b> | <b>Y = 84/92</b><br><b>N = 8/92</b> | <b>Y=54/92</b><br><b>Ambiguous =</b> | <b>Y = 46/92</b><br><b>Ambiguous =</b> | <b>Y = 48/92</b><br><b>N = 44</b> |

**30/92**                      **38/92**  
**Unknown=8/92**        **Unknown = 8/92**

<sup>a</sup> Y = yes, N = no.

<sup>b</sup> Serotypes of PPV23 and PCV13 are indicated in bold.

<sup>c</sup> Serotypes that are amplifiable by PCR but give ambiguous results are indicated as two or more serotypes having the same top BLAST bit scores.

<sup>d</sup> Serotypes deemed non-amplifiable in initial *in silico* analysis are not included in the subsequent tests on identifiable serotypes, therefore resolution power is unknown for these serotypes.
